# Supplementary material for: What is the role of a specialist regional mesothelioma multidisciplinary team meeting? A service evaluation of one tertiary referral centre in the UK
Source: PubMed Central journal article supplement — BMJ Open. 2016 Sep 8;6(9):e012092. doi: 10.1136/bmjopen-2016-012092 (PMC5020854; doi:10.1136/bmjopen-2016-012092), 2016-09-08
Supplement: bmjopen-2016-012092supp_appendixA.pdf [file bmjopen-2016-012092supp_appendixA.pdf]

Appendix A – An example of a MDT meeting pro-forma, with both referral and outcome sections completed (using imaginary patient information)

# Mesothelioma MDT Referral Form

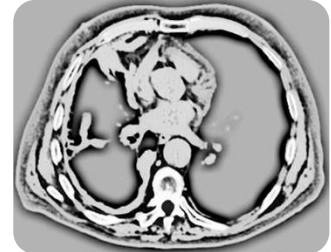

Please enter data into light grey areas using form fields and drop-down menus.  
Once form is complete, **save locally as .doc file or .docx file** (NOT .dot file) before sending to xxxxx with "MESO MDT referral" as the subject header

**ALL FIELDS ARE MANDATORY. INCOMPLETE FORMS WILL BE RETURNED.**

|                                                                                                                |                                                                                                                                                                                                                                                                                                                           |                                                           |
|----------------------------------------------------------------------------------------------------------------|---------------------------------------------------------------------------------------------------------------------------------------------------------------------------------------------------------------------------------------------------------------------------------------------------------------------------|-----------------------------------------------------------|
| <b>Date of referral</b>                                                                                        | 22/1/15                                                                                                                                                                                                                                                                                                                   |                                                           |
| <b>Email(s) to send outcome form to</b>                                                                        | xxx                                                                                                                                                                                                                                                                                                                       |                                                           |
| <b>Contact / referring physician</b>                                                                           | xxx                                                                                                                                                                                                                                                                                                                       |                                                           |
| <b>Referring hospital</b>                                                                                      | Choose one or type another in adjacent box -->                                                                                                                                                                                                                                                                            |                                                           |
| <b>Reason for referral</b>                                                                                     | Confirmation of diagnosis of mesothelioma<br>Consideration of clinical trials                                                                                                                                                                                                                                             |                                                           |
|                                                                                                                |                                                                                                                                                                                                                                                                                                                           |                                                           |
| <b>Patient details</b>                                                                                         | <b>Name</b>                                                                                                                                                                                                                                                                                                               | xxx                                                       |
|                                                                                                                | <b>Date of birth</b>                                                                                                                                                                                                                                                                                                      | xxx                                                       |
|                                                                                                                | <b>NHS number</b>                                                                                                                                                                                                                                                                                                         | xxx                                                       |
|                                                                                                                | <b>Phone number</b>                                                                                                                                                                                                                                                                                                       | xxx                                                       |
| <b>Summary of patient history</b>                                                                              | Presented with left sided pleural effusion. Initial aspiration shows exudate, but cytology negative. Proceeded to medical thoracoscopy, biopsies of which show epithelioid mesothelioma.                                                                                                                                  |                                                           |
| <b>Previous asbestos exposure?</b>                                                                             | Yes – non-work related                                                                                                                                                                                                                                                                                                    |                                                           |
| <b>Current WHO performance status</b>                                                                          | 1                                                                                                                                                                                                                                                                                                                         |                                                           |
| <b>Specimen type(s) submitted for review (select all applicable)</b>                                           | <input type="checkbox"/> NONE<br><input checked="" type="checkbox"/> CYTOLOGY<br><input type="checkbox"/> RADIOLOGY-GUIDED PLEURAL BIOPSY SAMPLE<br><input checked="" type="checkbox"/> MEDICAL THORACOSCOPY BIOPSY SAMPLE<br><input type="checkbox"/> VATS BIOPSY SAMPLE<br><input type="checkbox"/> OTHER BIOPSY SAMPLE |                                                           |
| <b>Have your local pathology department been asked to send the appropriate slides to UH Bristol pathology?</b> | <input checked="" type="checkbox"/> YES<br><input type="checkbox"/> NO<br><input type="checkbox"/> Unknown<br><input type="checkbox"/> Not applicable                                                                                                                                                                     | Please ensure samples are marked for the attention of xxx |

**MESOTHELIOMA MDT MEETING OUTCOME (to be completed MDT meeting)**

|                                      |                                                                                                                                                                                                                                           |
|--------------------------------------|-------------------------------------------------------------------------------------------------------------------------------------------------------------------------------------------------------------------------------------------|
| <b>Date of MDT discussion</b>        | <b>28/1/15</b>                                                                                                                                                                                                                            |
| Radiology discussion notes           | CT: large left effusion, irregular pleural thickening, pleural plaque, would be in keeping with mesothelioma. Ascitic fluid also noted in the abdomen<br><b>IMIG stage: T4 N0 M0 Anatomic stage: -</b>                                    |
| Pathology discussion notes           | Biopsy shows epithelioid mesothelioma with supportive immunohistochemistry                                                                                                                                                                |
| <b>MDT outcome / recommendations</b> | <b>Epithelioid mesothelioma confirmed. Advise referral to oncology for consideration of chemotherapy.</b><br><b>This diagnosis has been accepted by the local coroner, and therefore Mrs X will not need a post-mortem when she dies.</b> |
| Eligibility for clinical trials      | <b>Could be eligible for the COMMAND study</b>                                                                                                                                                                                            |
| Discussed at MDT by                  | <b>Dr A (Respiratory Physician), Dr B (Radiologist), Dr C (Thoracic Oncologist), Dr D (Histopathologist)</b>                                                                                                                              |

DRAFT
